# Supplementary material
Source: PubMed Central journal article supplement (PMC4975950)
Supplement: NIHMS794892-supplement-1.pdf [file NIHMS794892-supplement-1.pdf]

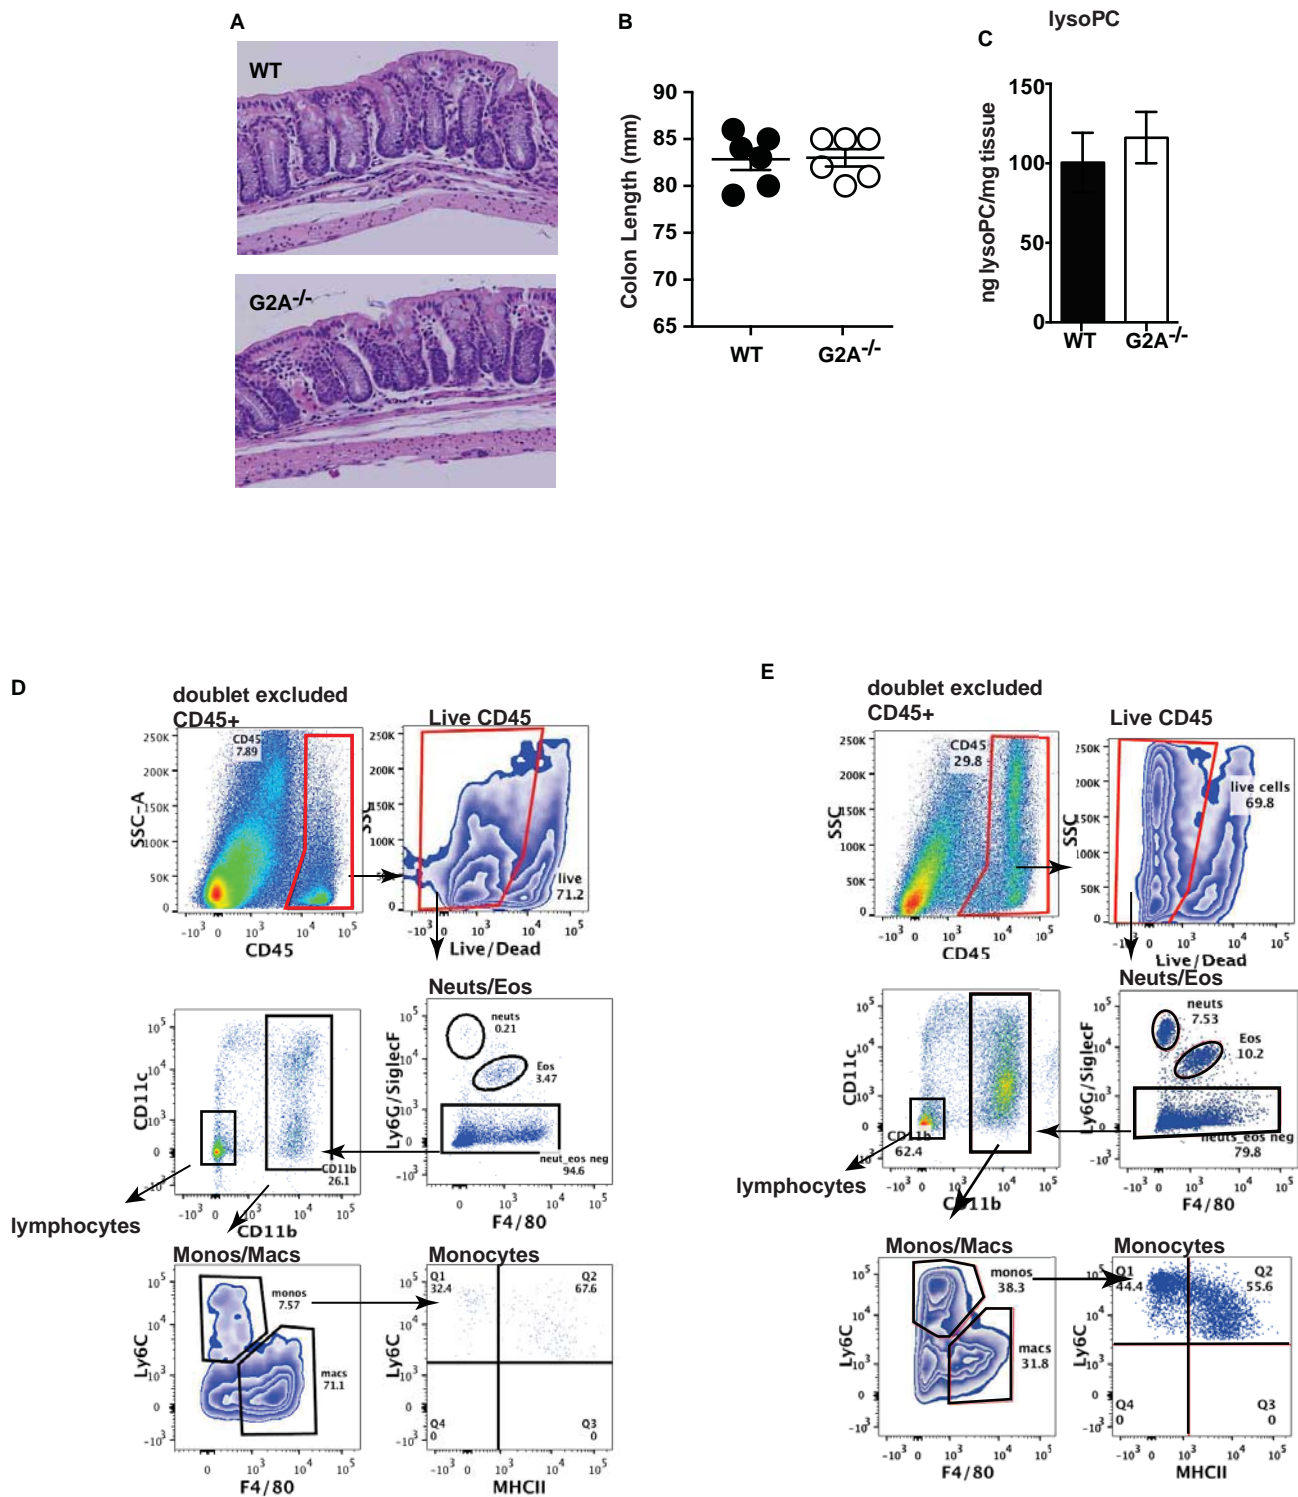

**Supplemental Figure 1. Baseline assessments of WT and G2A<sup>-/-</sup> water control mice.** *A*, representative histologic images from distal colon of naive water control WT and G2A<sup>-/-</sup> mice. *B*, colon length of naive water control WT and G2A<sup>-/-</sup> mice. *C*, total lysophosphatidylcholine (lysoPC) was quantified by LC-MS/MS from whole colon tissue in naive water control WT and G2A<sup>-/-</sup> mice. **Flow cytometry gating strategy.** Representative flow cytometry gating strategy to identify myeloid and lymphocyte populations from whole colon digests from naive water control colons (*D*) or day 6 DSS colons (*E*).

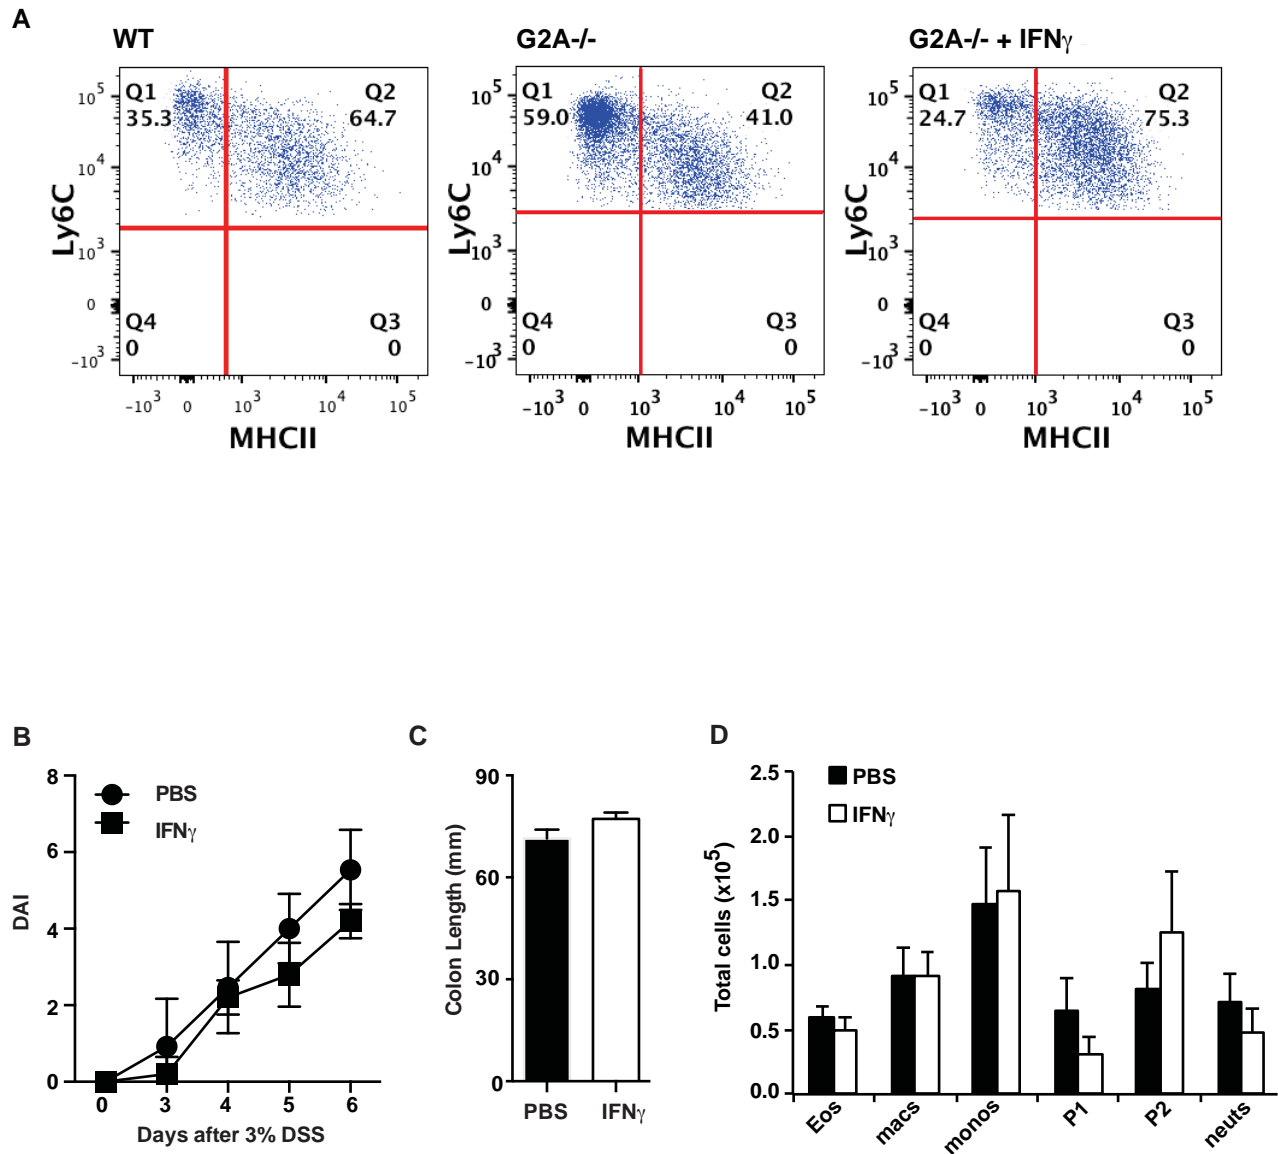

**Supplemental Figure 2: A** IFN $\gamma$  treatment enhances monocyte programming toward Ly6C<sup>int</sup>MHCII<sup>+</sup>. Representative dot plots of the monocyte population (Ly6C and MHCII) from digested colons of mice harvested at day 6 after DSS in WT, G2A<sup>-/-</sup> and G2A<sup>-/-</sup> treated with IFN $\gamma$  at days 3 and 5 after administration of DSS. These data are summarized and presented in Figure 8A in the parent manuscript. **B-D: IFN $\gamma$  treatment of WT mice during a timecourse of DSS colitis.** **B**, Disease activity index (DAI) was determined daily in WT mice that were treated with PBS or 5 $\mu$ g IFN $\gamma$  i.p. on days 3 and 5 after administration of 3% DSS. Maximum possible DAI score is 8. **C**, colon length of PBS or IFN $\gamma$  treated WT mice (treated as in B) at day 6 after administration of 3% DSS. **D**, Total cell counts from digested colons on day 6 after DSS administration in WT mice treated with IFN $\gamma$  as in B.
